# Supplementary material
Source: PubMed Central journal article supplement (PMC3226840)
Supplement: NIHMS330535-supplement-1_si_001.pdf [file NIHMS330535-supplement-1_si_001.pdf]

## Non-enzymatic assembly of natural polyubiquitin chains of any linkage composition and isotopic labeling scheme

Carlos Castañeda, Jia Liu, Apurva Chaturvedi, Urszula Nowicka, T. Ashton Cropp, David Fushman

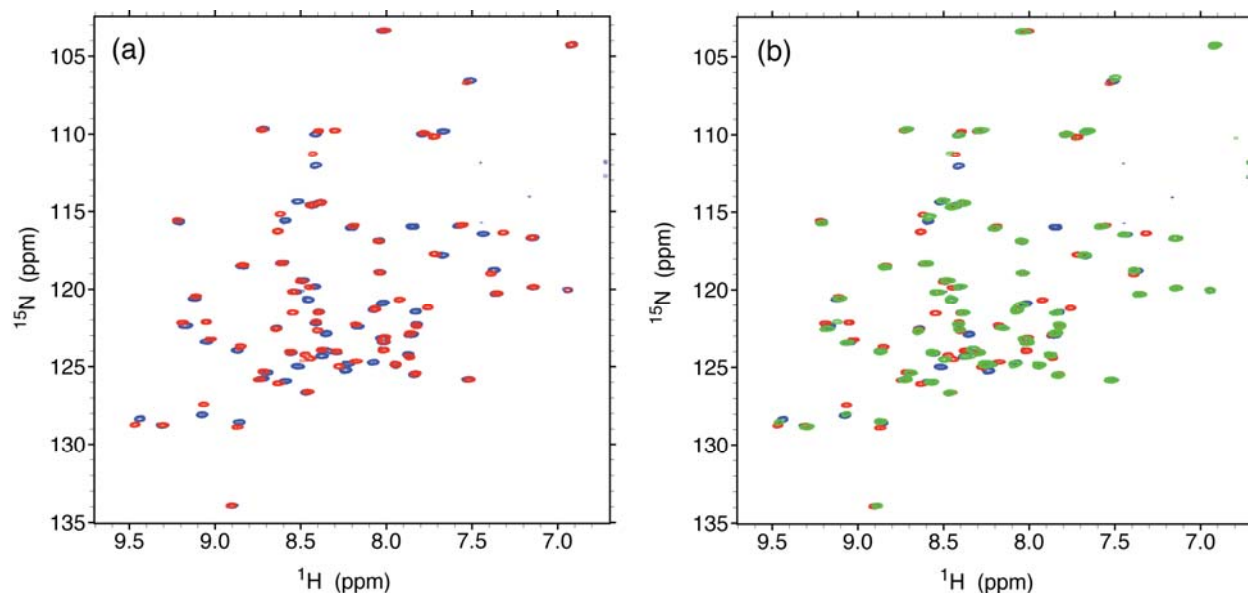

**Figure S1.**  $^1\text{H}$ - $^{15}\text{N}$  TROSY-HSQC spectra highlighting the importance of domain-specific isotopic labeling for Ub units in polyubiquitin chains. (a) Overlay of the spectra of the distal Ub (red) and the proximal Ub (blue) in all-natural K11-linked  $\text{Ub}_2$  showing significant overlap of the signals from the two Ub monomers. (b) Overlay of the spectra of the middle domain in all-natural K11-linked  $\text{Ub}_3$  (green), the distal Ub (red) of K11-linked  $\text{Ub}_2$  and the proximal Ub (blue) of K11-linked  $\text{Ub}_2$ . The overlap of the NMR signals from the individual Ub units (reflecting their chemical and spectroscopic identity) would make it essentially impossible to distinguish which signal belongs to which Ub unit if the chain was uniformly isotope-labeled.

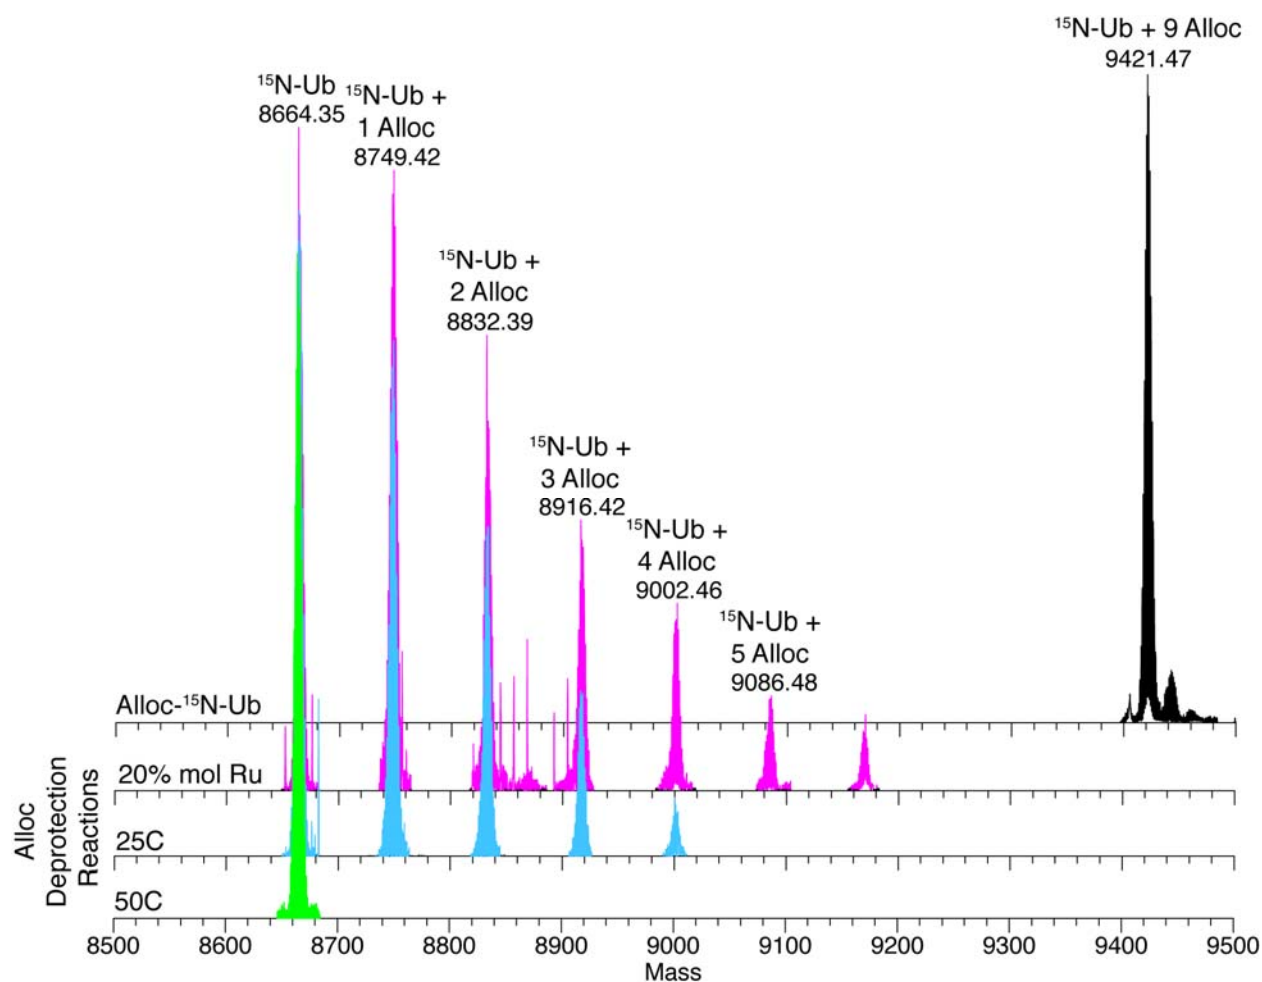

**Figure S2.** Optimization of Alloc deprotection reactions. In black is the deconvoluted ESI-MS spectrum of  $^{15}\text{N-Ub}$  that is fully protected with nine Alloc groups (each Alloc group has a MW of 84 Da). Optimal Alloc deprotection conditions require the use of 50% mol Ru catalyst, 50 eq of thiophenol, 30%  $\text{H}_2\text{O}$  and 50 °C. After the reaction is incubated for two hours, the protein is fully deprotected (green). If less catalyst (magenta) or lower temperature (sky blue) are used, the Alloc deprotection reaction does not go to completion, resulting in a distribution of multiple Ub species containing a variable number of Alloc groups.

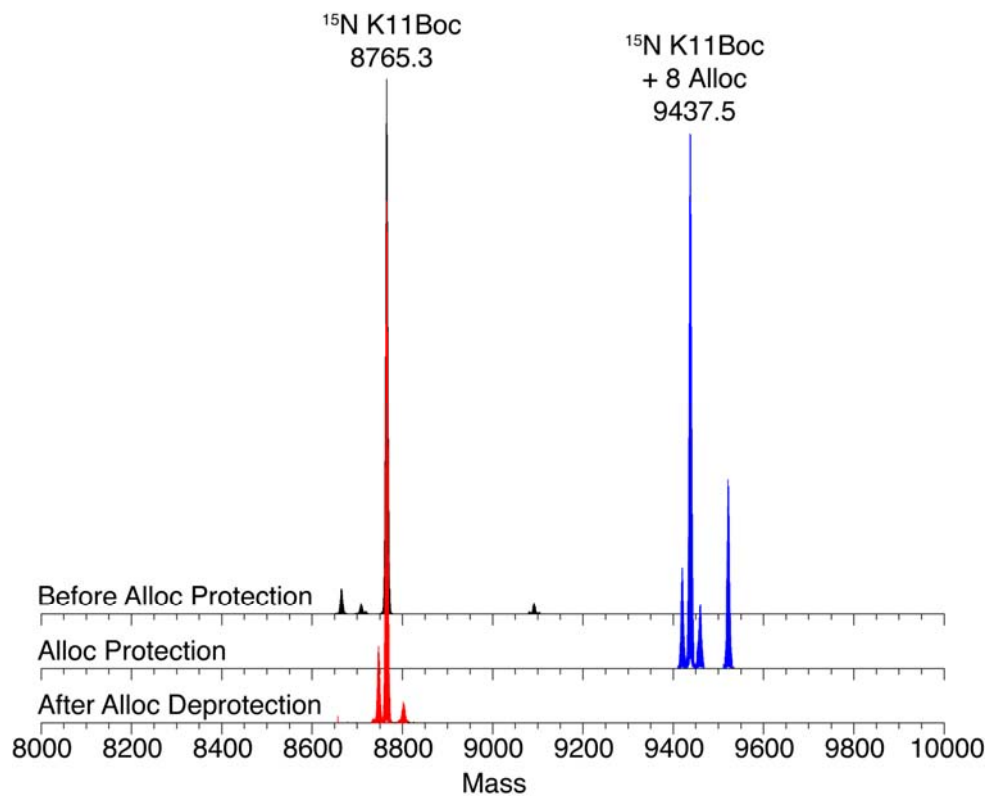

**Figure S3.** ESI-MS analyses demonstrate that Alloc deprotection does not remove the Boc group on Ub. Shown in black and red are ESI-MS spectra of  $^{15}\text{N}$ -labeled K11Boc Ub before Alloc protection and after Alloc deprotection, respectively. Shown in blue is the ESI-MS spectrum of this protein after Alloc protection.

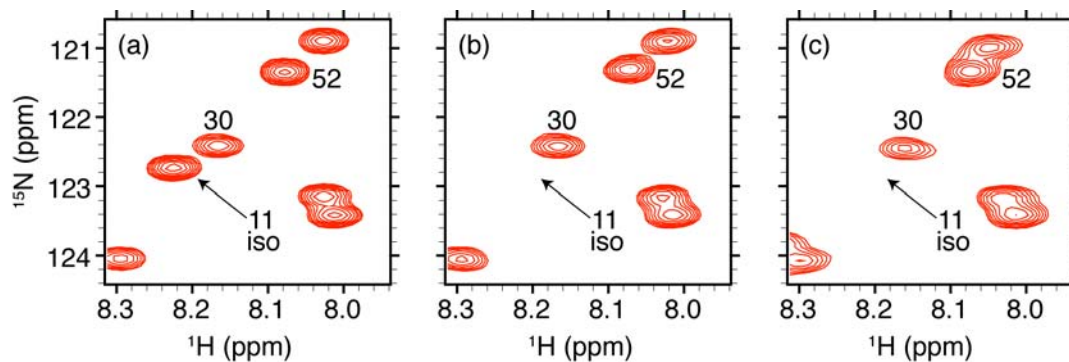

**Figure S4.** Portion of  $^1\text{H}$ - $^{15}\text{N}$  TROSY spectra of (a) proximal Ub in enzymatically assembled K11-linked Ub<sub>2</sub>, (b) proximal Ub in chemically ligated K11-linked Ub<sub>2</sub>, and (c) middle Ub in chemically ligated homogeneously K11-linked Ub<sub>3</sub>. Arrow points toward the G76-K11 isopeptide signal that is present in the spectrum in (a). This signal is absent in the spectra in (b) and (c) due to the incorporation of unlabeled ( $^{14}\text{N}$ ) Lys(Boc) amino acid at residue 11.

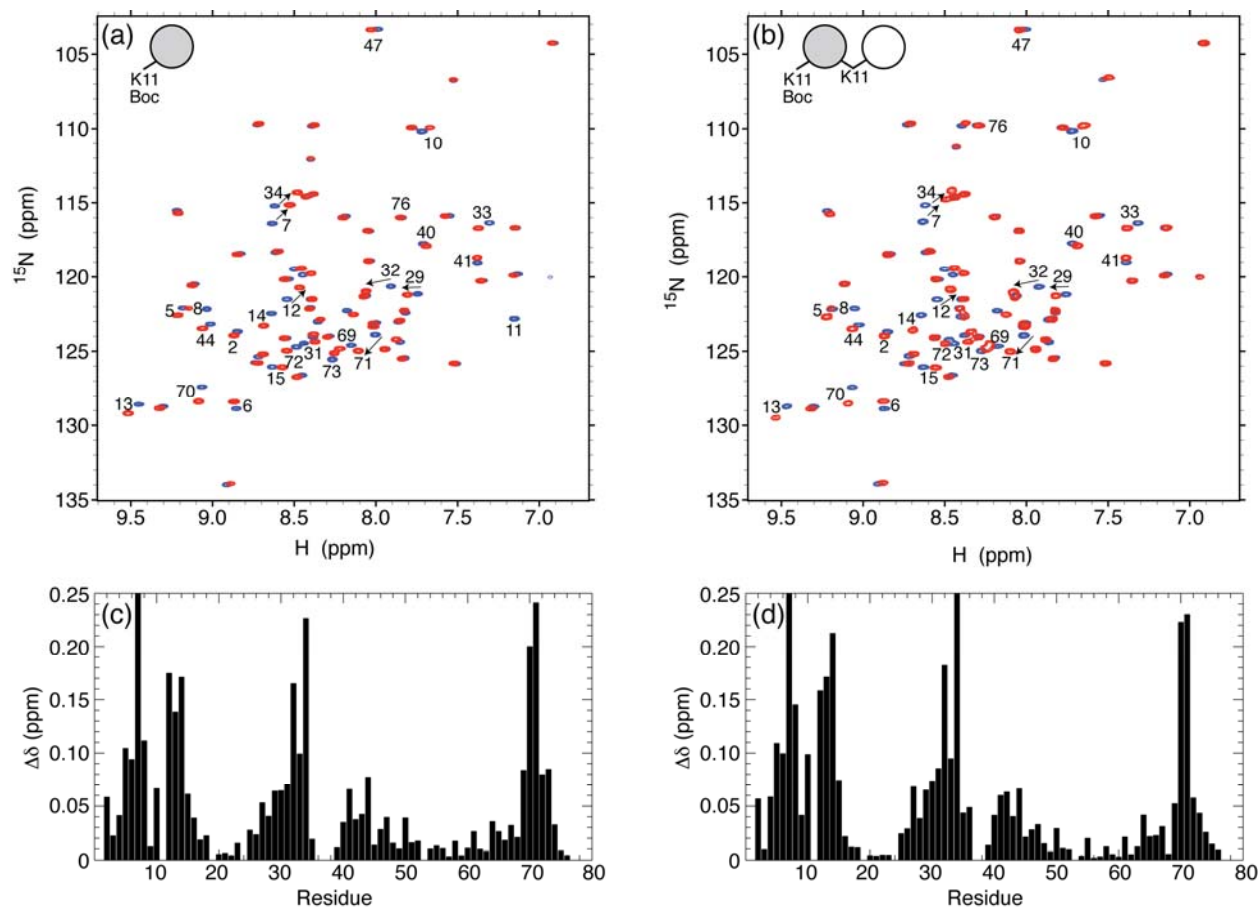

**Figure S5.** (a) Overlay of  $^1\text{H}$ - $^{15}\text{N}$  TROSY spectra of K11Boc Ub monomer (red) and WT Ub (blue). (b) Overlay of  $^1\text{H}$ - $^{15}\text{N}$  TROSY spectra of the distal K11Boc Ub in K11-linked  $\text{Ub}_2$  (red) and of the distal Ub in all-natural K11-linked  $\text{Ub}_2$  (blue). (c,d) The spectral differences between residues in (c) K11Boc Ub and WT Ub and (d) distal K11Boc in K11-linked  $\text{Ub}_2$  and distal Ub in all-natural K11-linked  $\text{Ub}_2$  are quantified as amide chemical shift perturbations (CSPs). The CSPs were calculated as  $\Delta\delta = [(\Delta\delta_{\text{H}})^2 + (\Delta\delta_{\text{N}}/5)^2]^{1/2}$ , where  $\Delta\delta_{\text{H}}$  and  $\Delta\delta_{\text{N}}$  are chemical shift differences for  $^1\text{H}$  and  $^{15}\text{N}$ , respectively.

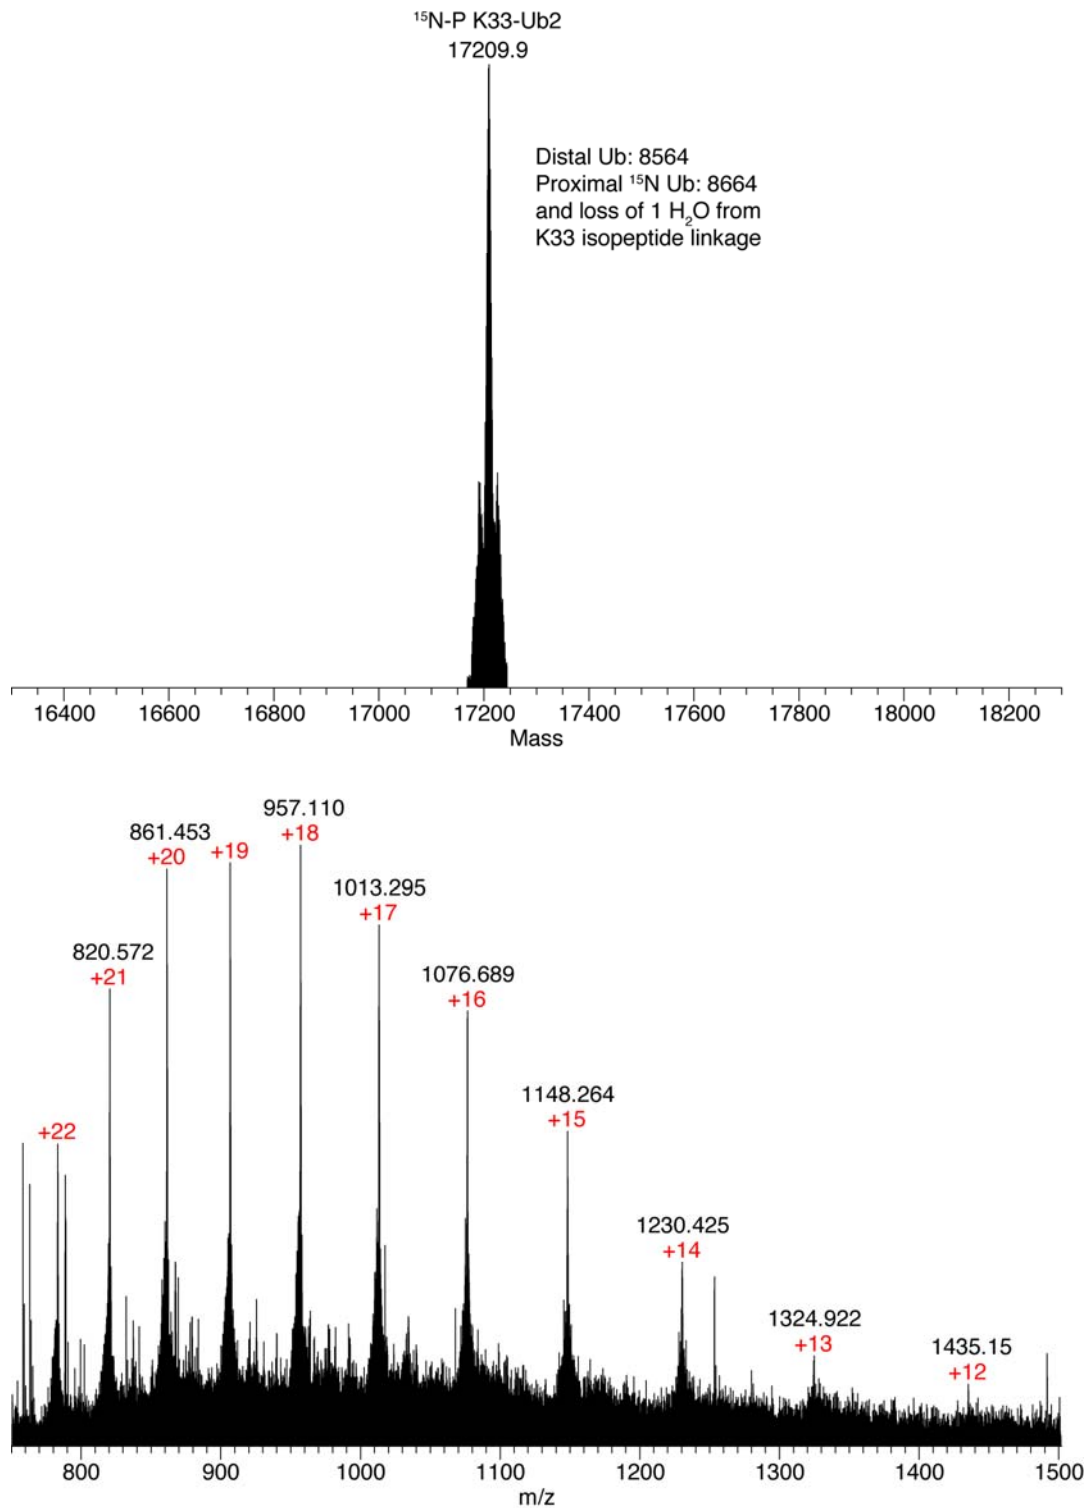

**Figure S6.** ESI-MS analysis of K33-linked Ub<sub>2</sub> with the proximal Ub <sup>15</sup>N-labeled. The expected molecular weight is 17210 Da, resulting from the sum of one unlabeled Ub (8564 Da), one TFA-treated <sup>15</sup>N-labeled Ub (8664 Da), and the loss of one water molecule from the K33 isopeptide linkage condensation.

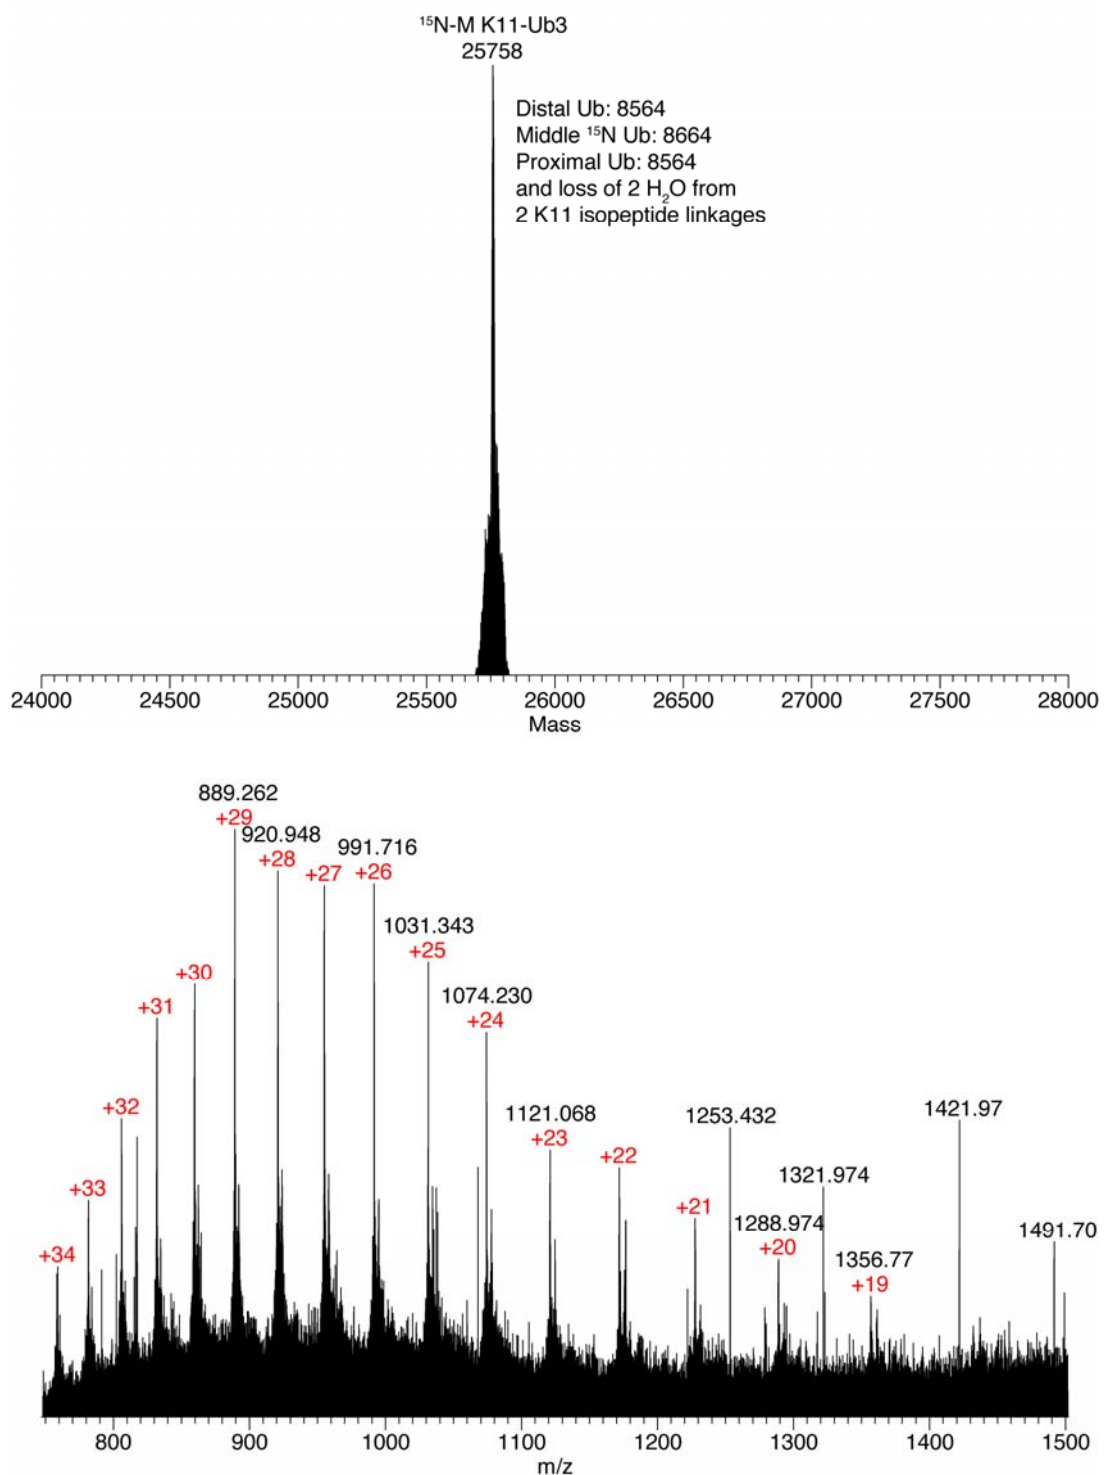

**Figure S7.** ESI-MS analysis of homogeneously K11-linked  $\text{Ub}_3$  with the middle Ub  $^{15}\text{N}$ -labeled. The expected molecular weight is 25756 Da, resulting from the sum of two unlabeled Ubs (8564 Da), one TFA-treated  $^{15}\text{N}$ -labeled Ub (8664 Da), and the loss of two water molecules from two K11 isopeptide linkage condensations.

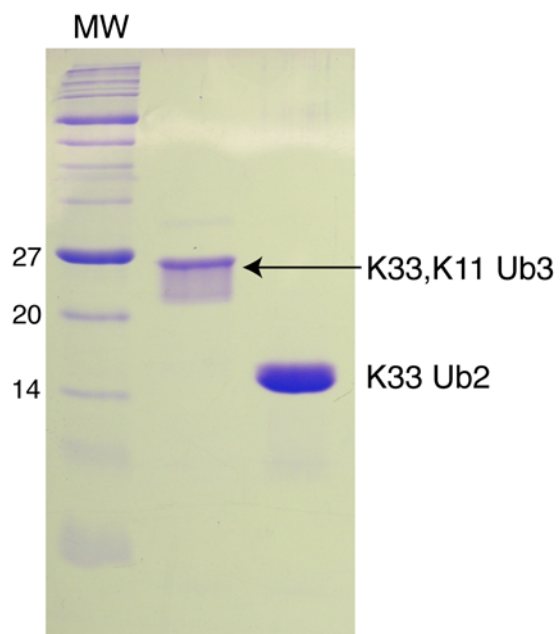

**Figure S8.** SDS-PAGE gel of purified (post size exclusion chromatography) K33,K11-linked Ub<sub>3</sub> and K33-linked Ub<sub>2</sub>. The ESI-MS characterization of the K33-linked Ub<sub>2</sub> is shown in Fig.S9.

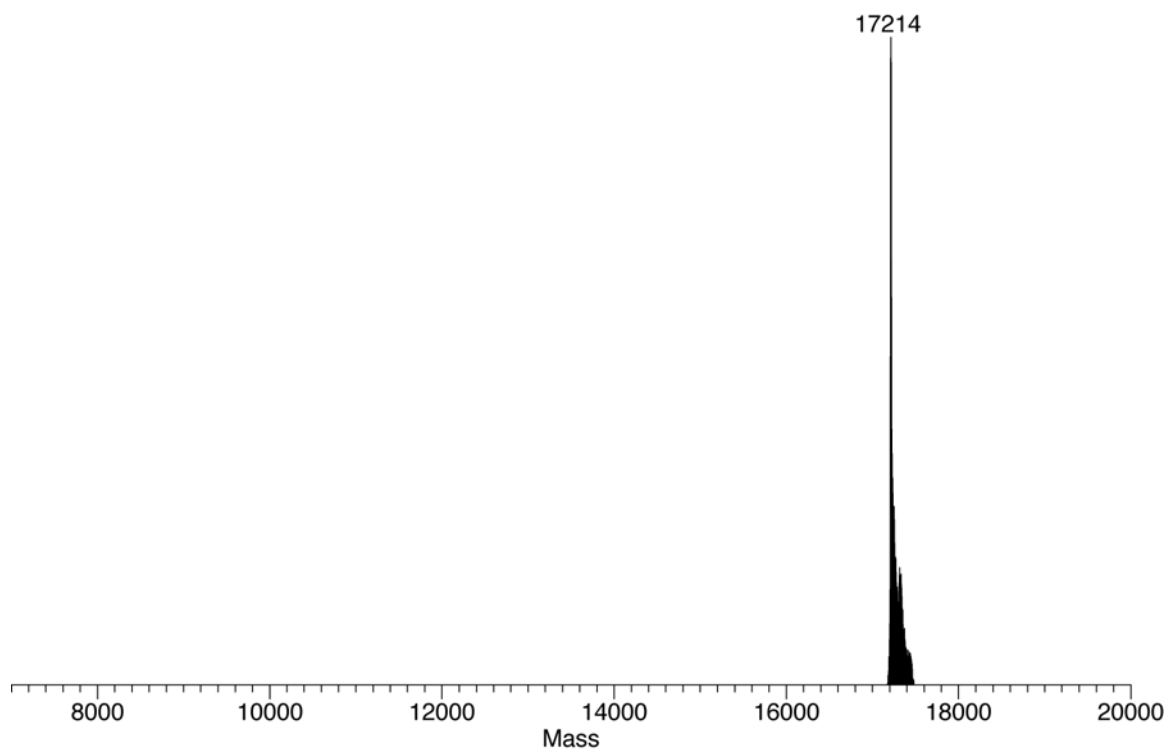

**Figure S9.** ESI-MS spectrum of purified K33-linked Ub<sub>2</sub> (<sup>15</sup>N-labeled on the distal Ub). No monomer contamination is evident; no peaks at either 8564 (unlabeled Ub) or 8664 (<sup>15</sup>N-labeled Ub) are observed.



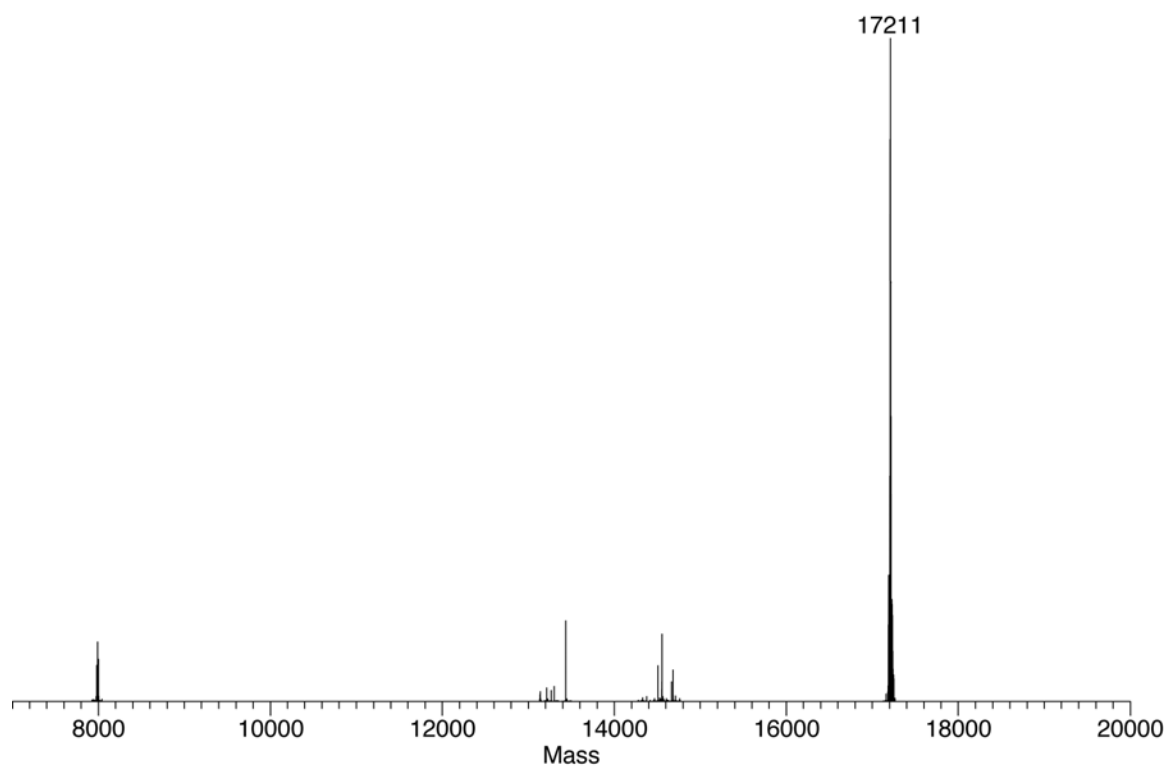

**Figure S10.** ESI-MS spectrum of purified K11-linked Ub<sub>2</sub> (<sup>15</sup>N-labeled on the proximal Ub). No monomer contamination is evident; no peaks at either 8564 (unlabeled Ub) or 8664 (<sup>15</sup>N-labeled Ub) are observed. A shorter mass-range version of this spectrum is shown in Fig. 1c (main text).

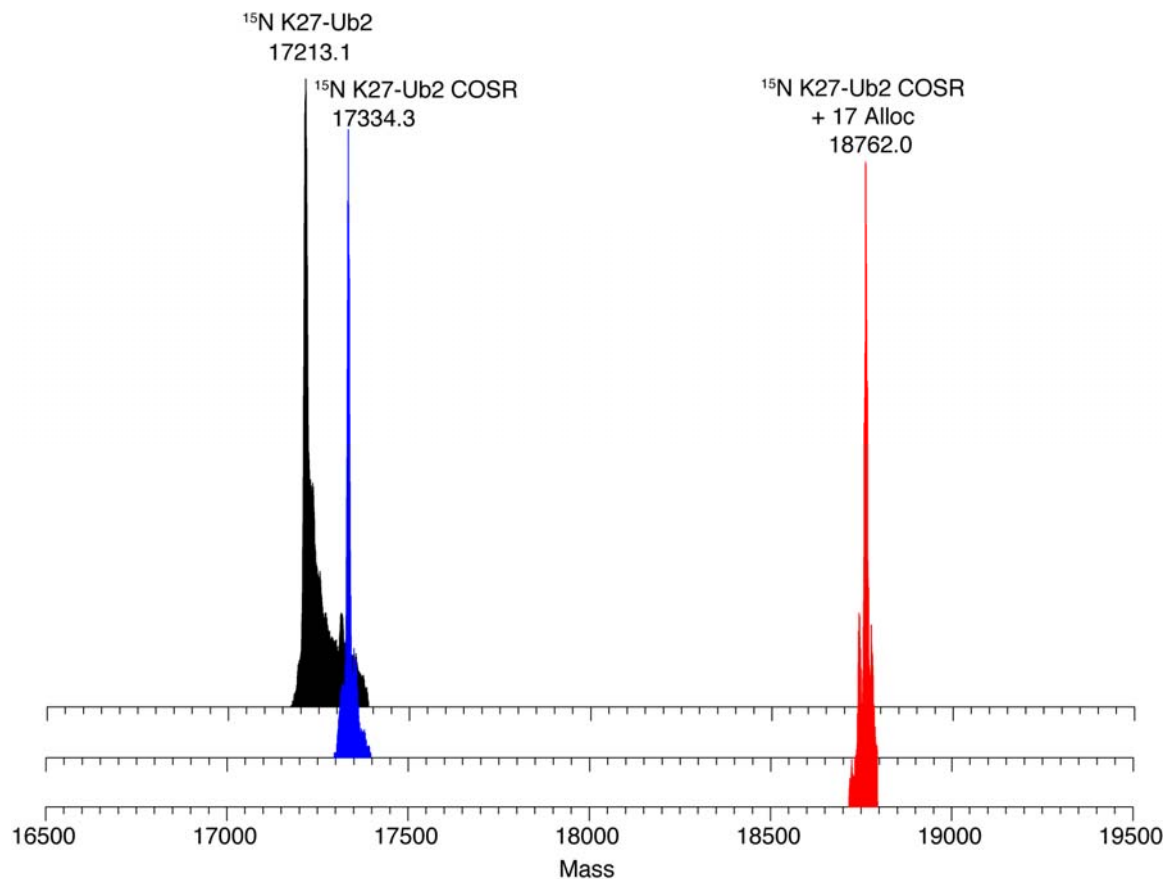

**Figure S11.** ESI-MS characterization of various steps in preparation of K27-linked Ub<sub>2</sub> (<sup>15</sup>N-labeled on the proximal Ub) to be used as the distal Ub in the assembly of a Ub<sub>3</sub> chain. The molecular weight of K27-linked Ub<sub>2</sub> is 17211 Da (black). Reaction with E1 and MESNA adds a C-terminal thioester functional group to Ub<sub>2</sub>, increasing its molecular weight by ~125 Da to 17335 Da (blue), and fully converts *all* Ub<sub>2</sub>s into Ub<sub>2</sub>-SR. Alloc protection of K27-linked Ub<sub>2</sub> (red) adds a total of 17 Alloc groups (nine Alloc groups on the distal Ub and eight Alloc groups on the proximal Ub as its K27 is already involved in the isopeptide linkage to the distal Ub). Each Alloc protecting group adds 84 Da.
